# Supplementary material for: Fip1 is a multivalent interaction scaffold for processing factors in human mRNA 3′ end biogenesis
Source: eLife. 2022 Sep 8;11:e80332. doi: 10.7554/eLife.80332 (PMC9512404; doi:10.7554/eLife.80332)
Supplement: Figure 4—source data 3. — Same as Figure 2—source data 5. [file elife-80332-fig4-data3.zip]

Archive with 4 entries (4 files):
- Figure 4-source data 3.pdf
- __MACOSX/._Figure 4-source data 3.pdf
- Figure 4-source data 3.gel
- __MACOSX/._Figure 4-source data 3.gel
