# Supplementary figures and images for: Fip1 is a multivalent interaction scaffold for processing factors in human mRNA 3′ end biogenesis
Source: eLife journal article supplement (doi:10.7554/elife.80332), 2022-09-08

Figure 1-source data 1

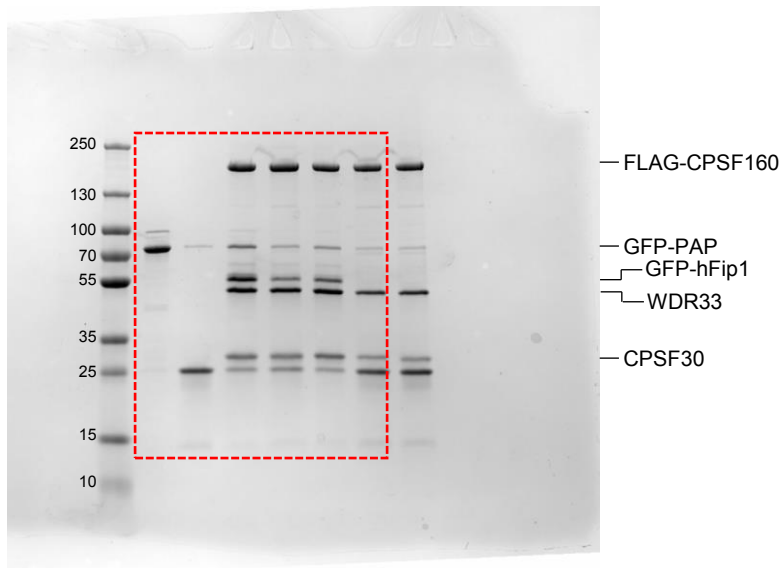

Supplement: fig1-data1 [file elife-80332-fig1-data1-v2.zip]

Figure 1-source data 2

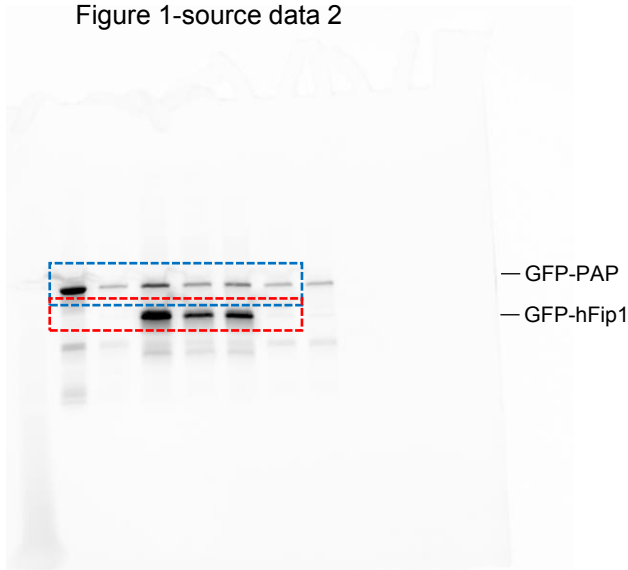

Supplement: fig1-data2 [file elife-80332-fig1-data2-v2.zip]

Figure 1-figure supplement 2-source data 1

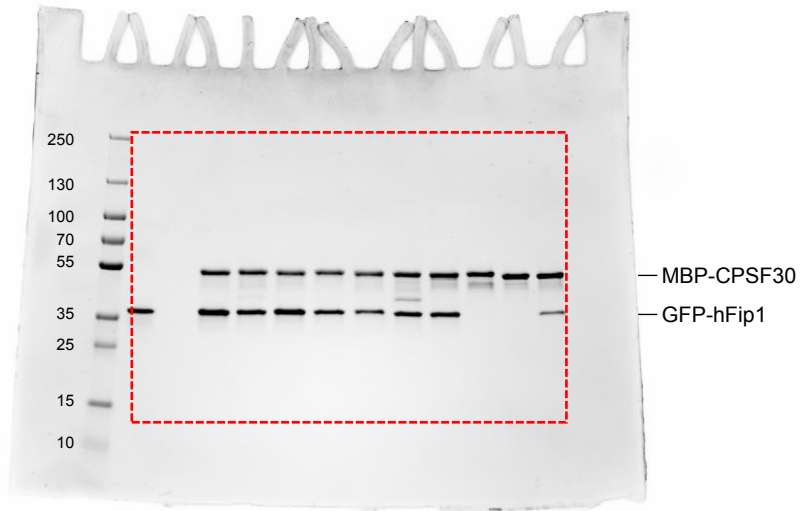

Supplement: fig1-figsupp2-data1 [file Figure 1-figure supplement 2-source data 1.pdf › Figure 1-figure supplement 2-source data 1.pdf]

Figure 1-figure supplement 2-source data 2

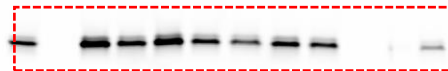

— GFP-hFip1

Supplement: fig1-figsupp2-data2 [file elife-80332-fig1-figsupp2-data2-v2.zip]

Figure 1-figure supplement 2-source data 3

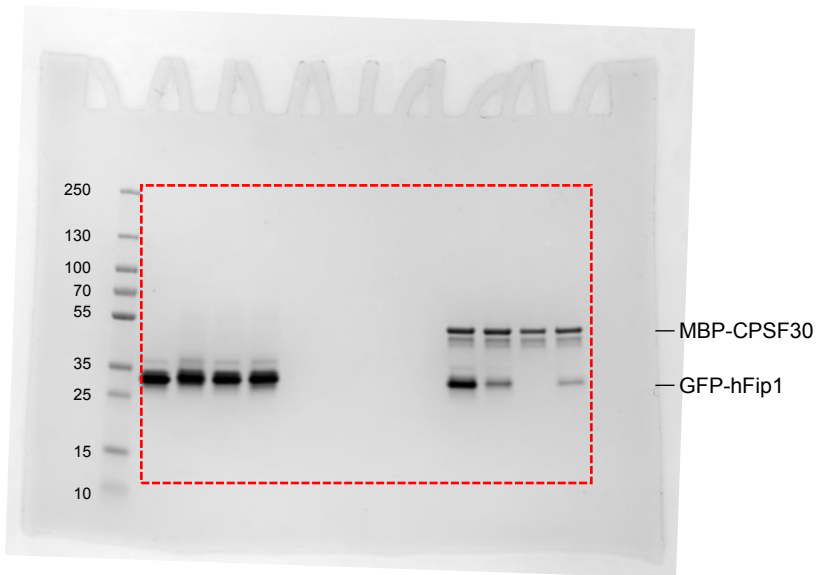

Supplement: fig1-figsupp2-data3 [file elife-80332-fig1-figsupp2-data3-v2.zip]

Figure 1-figure supplement 2-source data 4

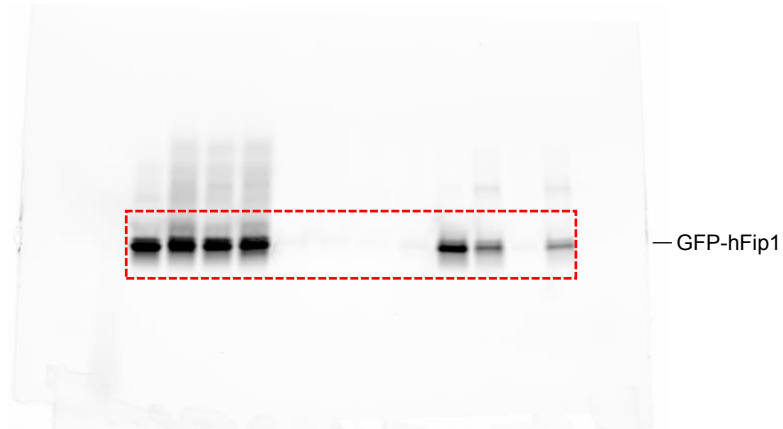

Supplement: fig1-figsupp2-data4 [file elife-80332-fig1-figsupp2-data4-v2.zip]

Figure 2-source data 1

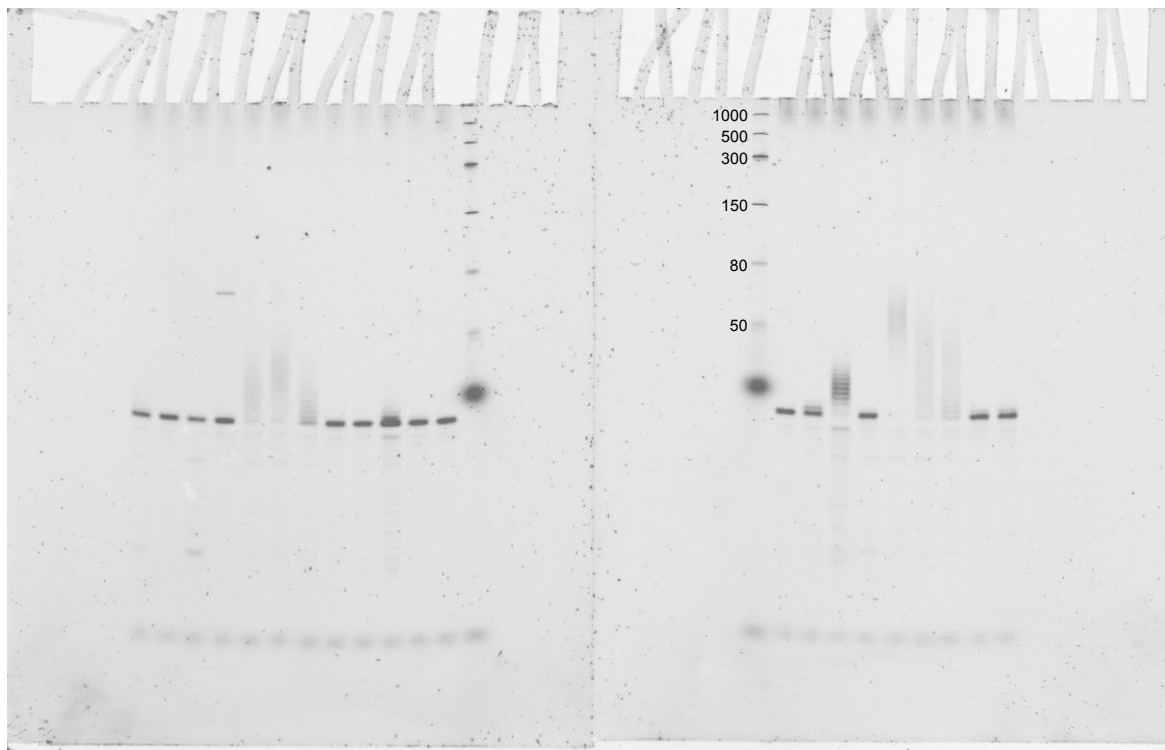

Overlay  
473 nm/635 nm

Supplement: fig2-data1 [file Figure 2-source data 1.pdf › Figure 2-source data 1.pdf]

Figure 2-source data 3

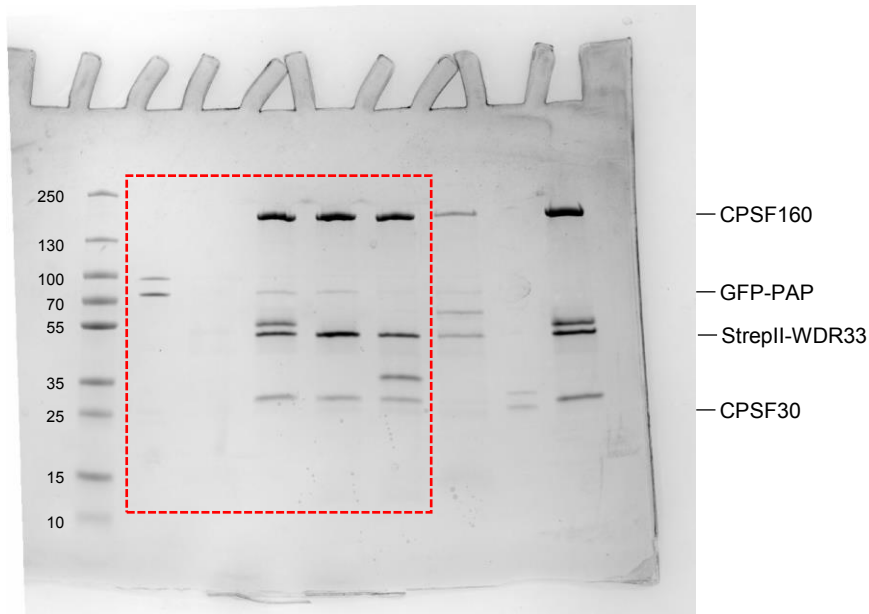

Supplement: fig2-data3 [file Figure 2-source data 3.pdf › Figure 2-source data 3.pdf]

Figure 2-source data 4

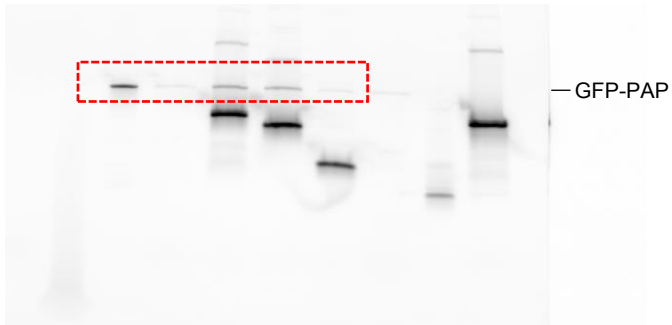

Supplement: fig2-data4 [file Figure 2-source data 4.pdf › Figure 2-source data 4.pdf]

Figure 2-source data 5

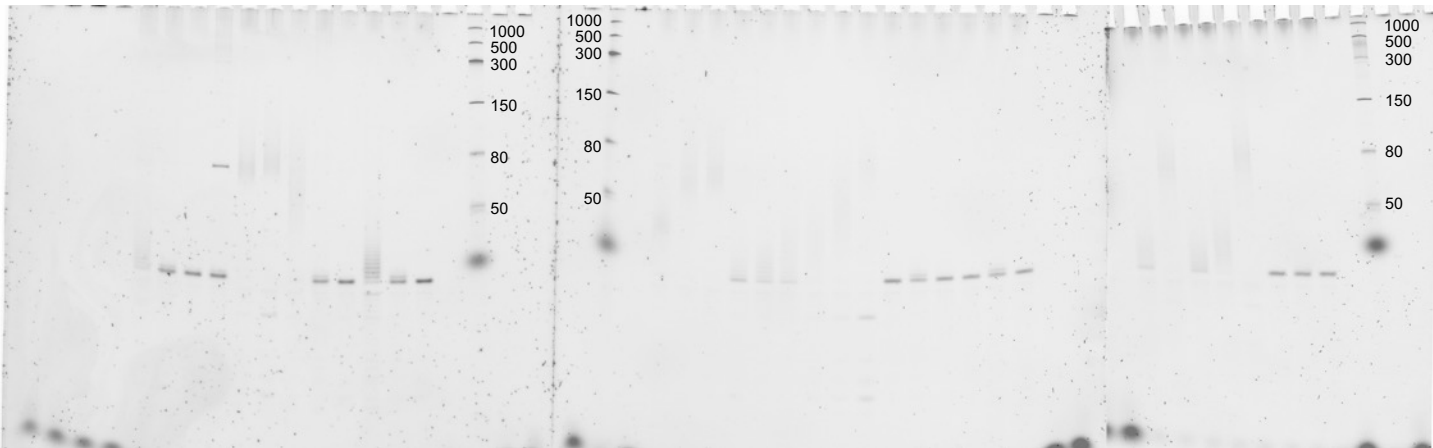

Overlay  
473 nm/635 nm

Supplement: fig2-data5 [file Figure 2-source data 5.pdf › Figure 2-source data 5.pdf]

Figure 2-source data 6

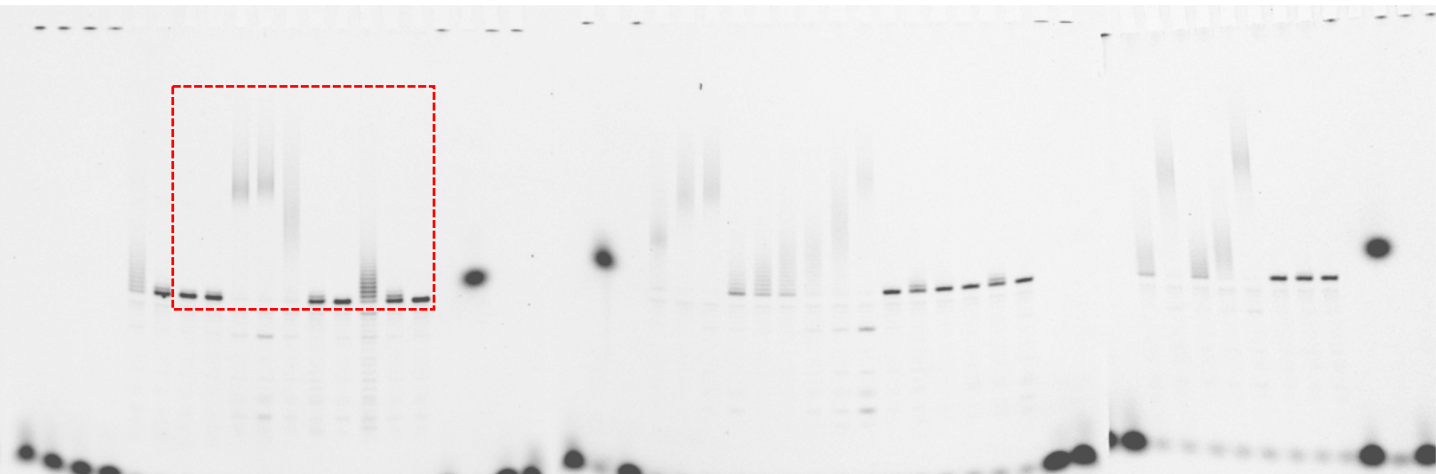

Supplement: fig2-data6 [file elife-80332-fig2-data6-v2.zip]

Figure 2-figure supplement 1-source data 1

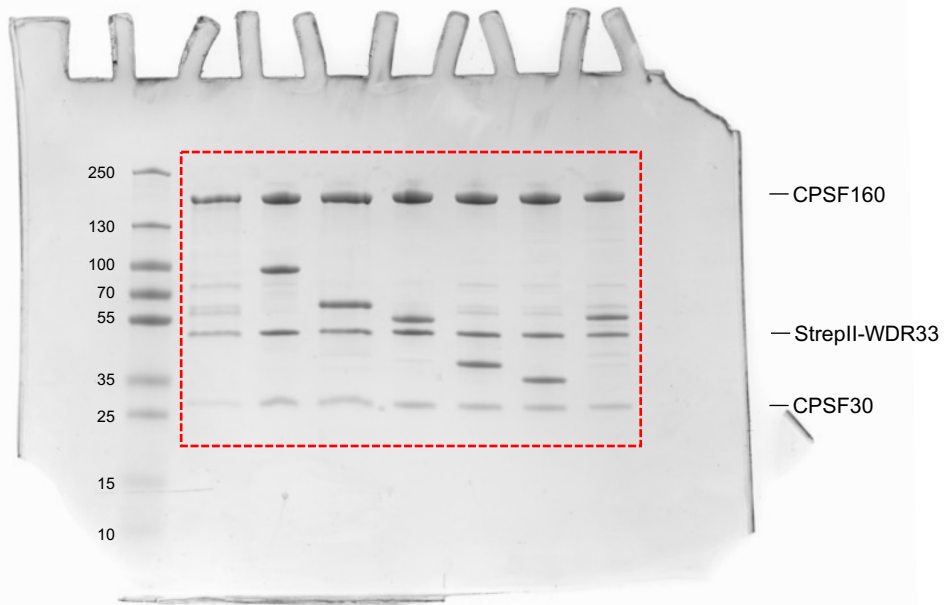

Supplement: fig2-figsupp1-data1 [file elife-80332-fig2-figsupp1-data1-v2.zip]

Figure 2-figure supplement 1-source data 2

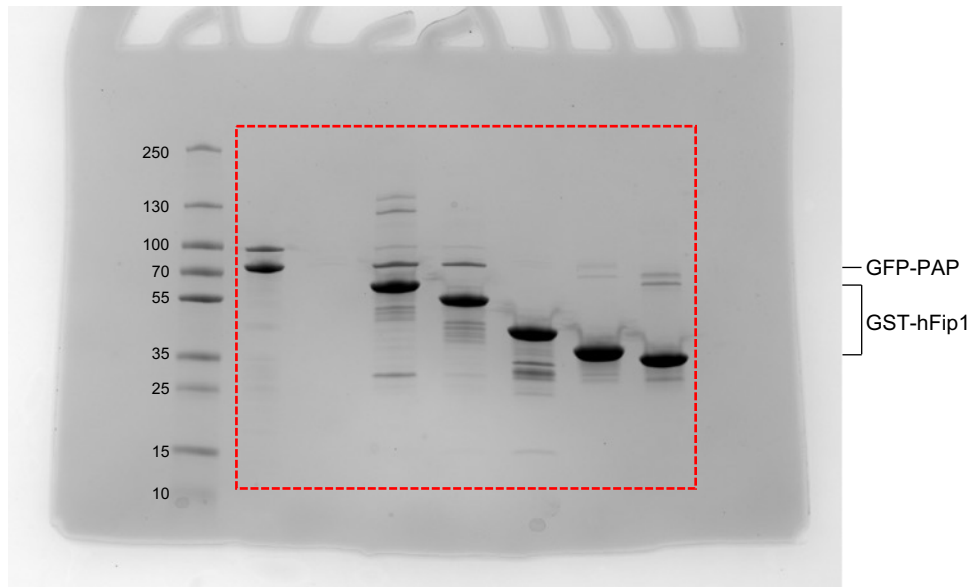

Supplement: fig2-figsupp1-data2 [file Figure 2-figure supplement 1-source data 2.pdf › Figure 2-figure supplement 1-source data 2.pdf]

Figure 2-figure supplement 1-source data 3

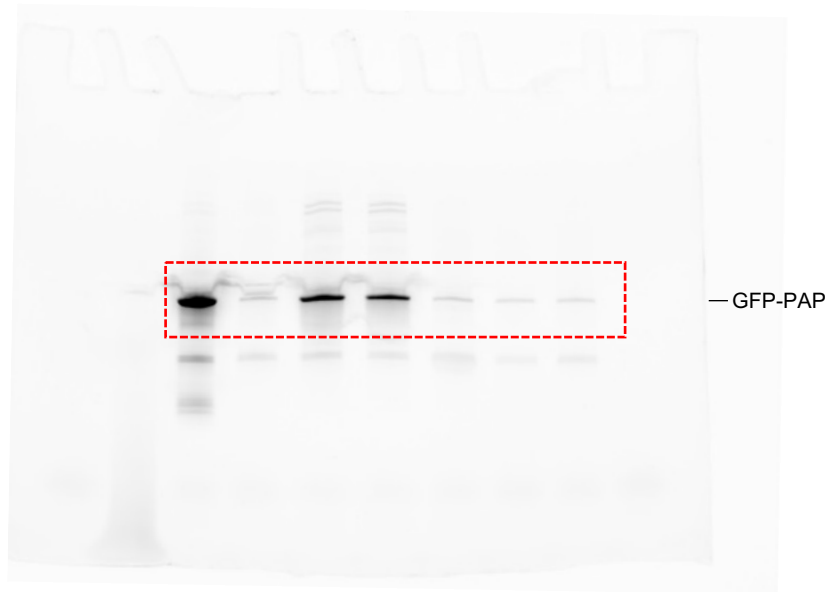

Supplement: fig2-figsupp1-data3 [file Figure 2-figure supplement 1-source data 3.pdf › Figure 2-figure supplement 1-source data 3.pdf]

Figure 3-source data 1

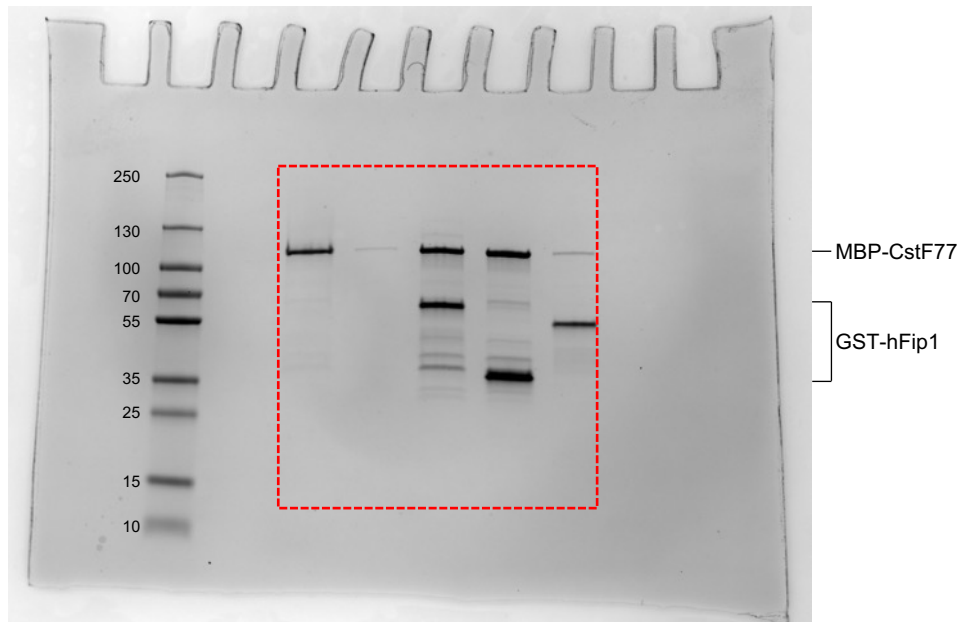

Supplement: fig3-data1 [file Figure 3-source data 1.pdf › Figure 3-source data 1.pdf]

Figure 3-source data 2

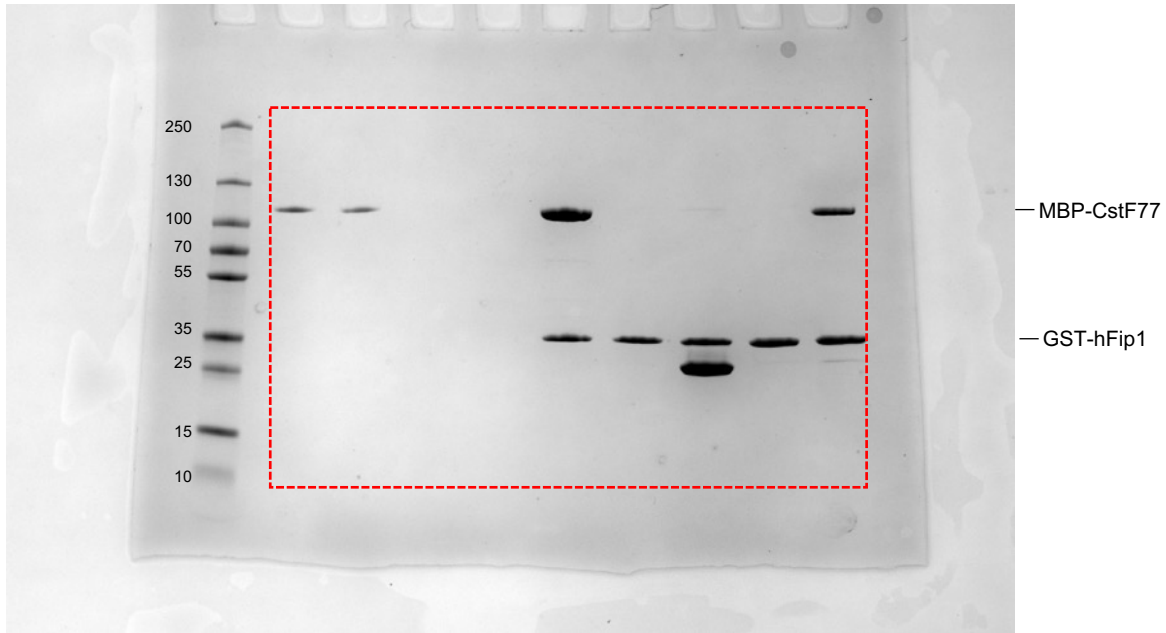

Supplement: fig3-data2 [file Figure 3-source data 2.pdf › Figure 3-source data 2.pdf]

Figure 3-figure supplement 2-source data 1

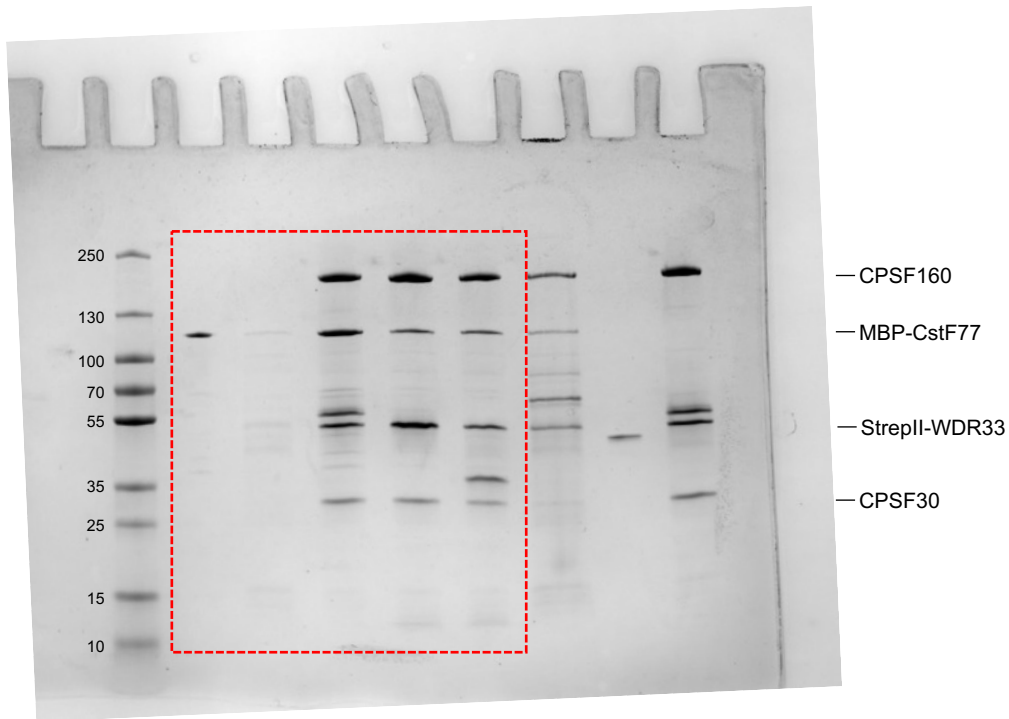

Supplement: fig3-figsupp2-data1 [file Figure 3-figure supplement 2-source data 1.pdf › Figure 3-figure supplement 2-source data 1.pdf]

Figure 3-figure supplement 3-source data 1

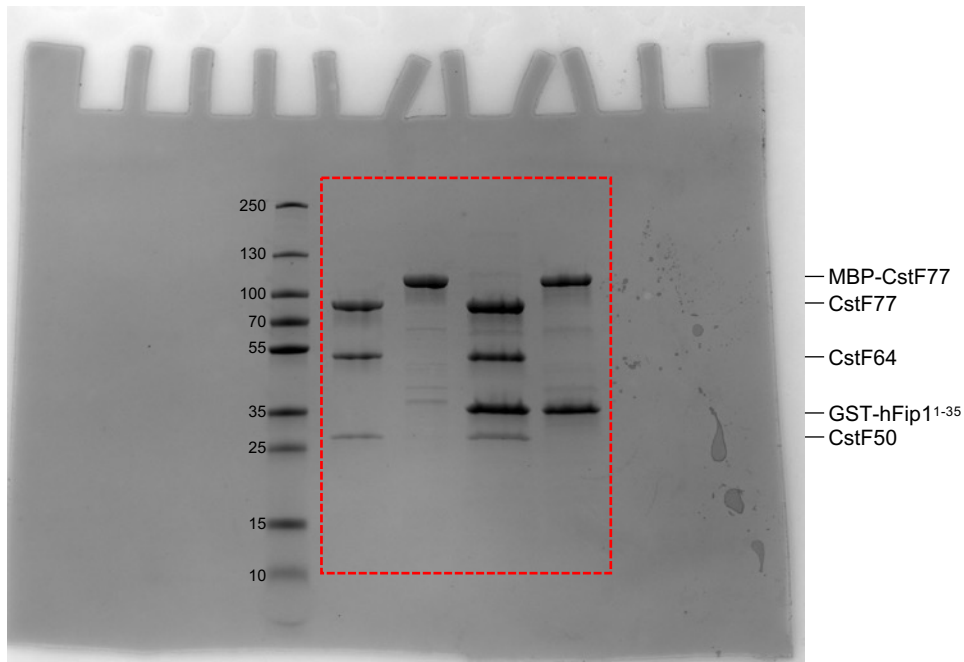

Supplement: fig3-figsupp3-data1 [file Figure 3-figure supplement 3-source data 1.pdf › Figure 3-figure supplement 3-source data 1.pdf]

Figure 4-source data 1

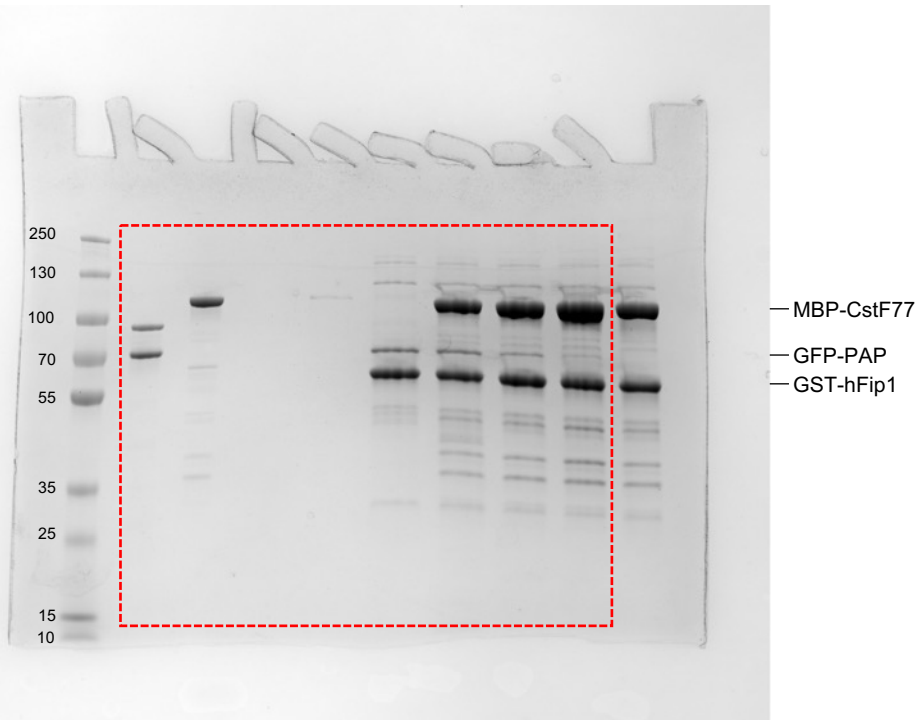

Supplement: fig4-data1 [file Figure 4-source data 1.pdf › Figure 4-source data 1.pdf]

Figure 4-source data 2

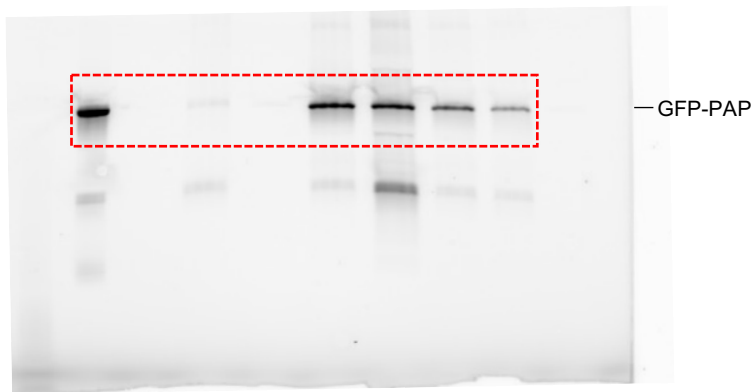

Supplement: fig4-data2 [file Figure 4-source data 2.pdf › Figure 4-source data 2.pdf]

Figure 4-source data 3

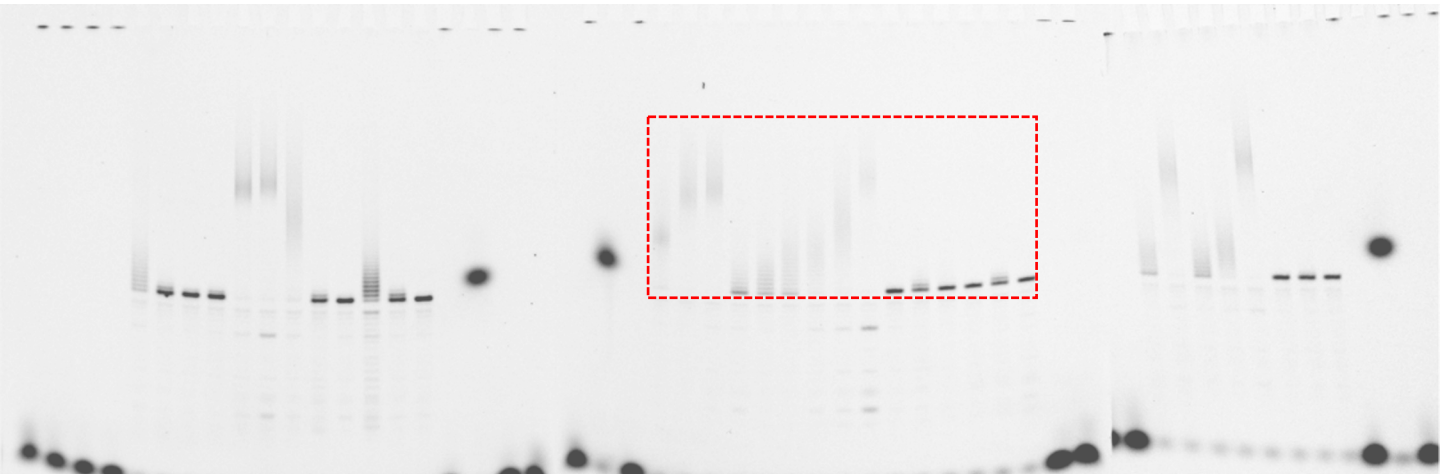

Supplement: fig4-data3 [file elife-80332-fig4-data3-v2.zip]

Figure 4-source data 4

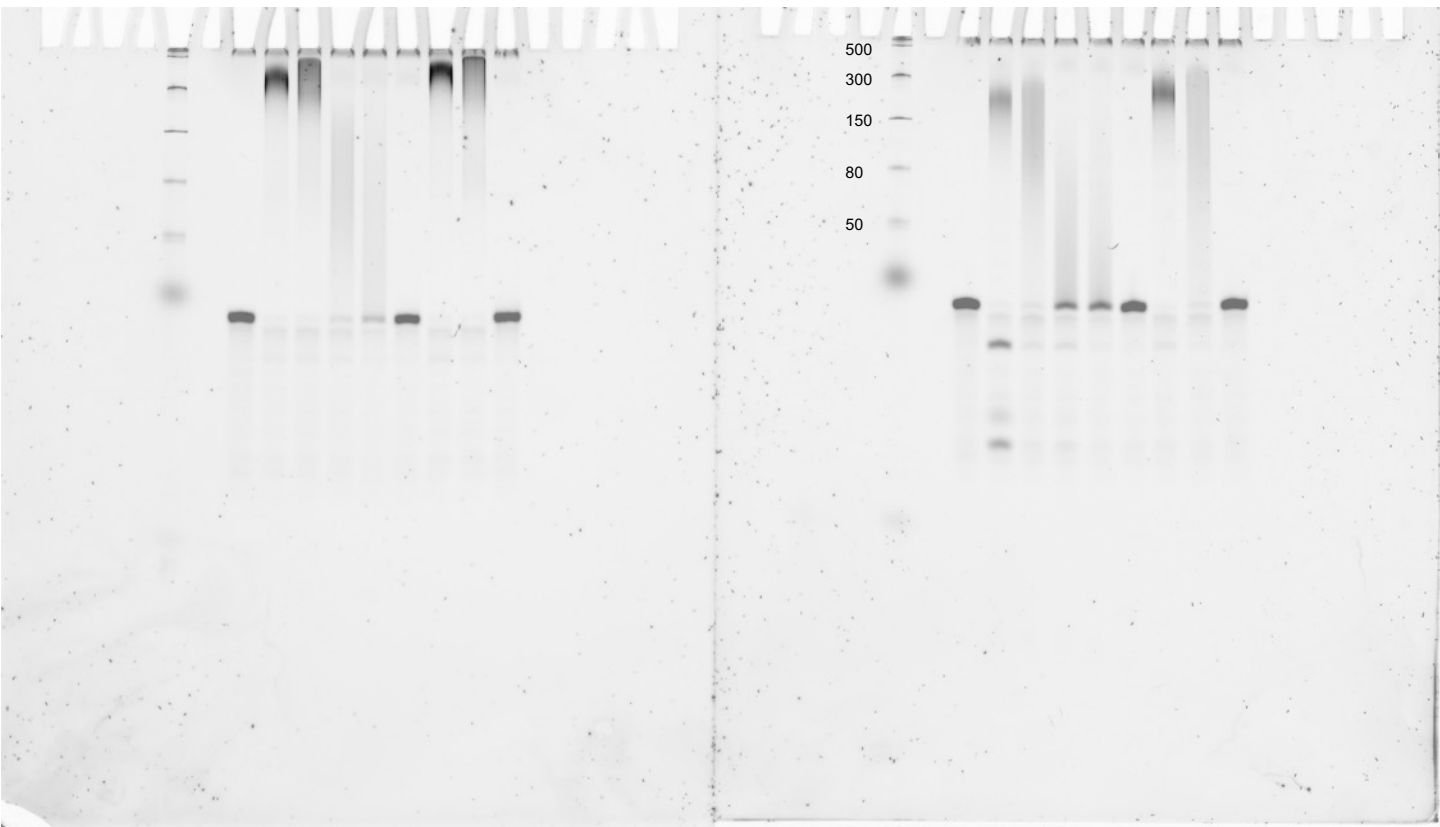

Overlay  
473 nm/635 nm

Supplement: fig4-data4 [file Figure 4-source data 4.pdf › Figure 4-source data 4.pdf]

Figure 4-source data 5

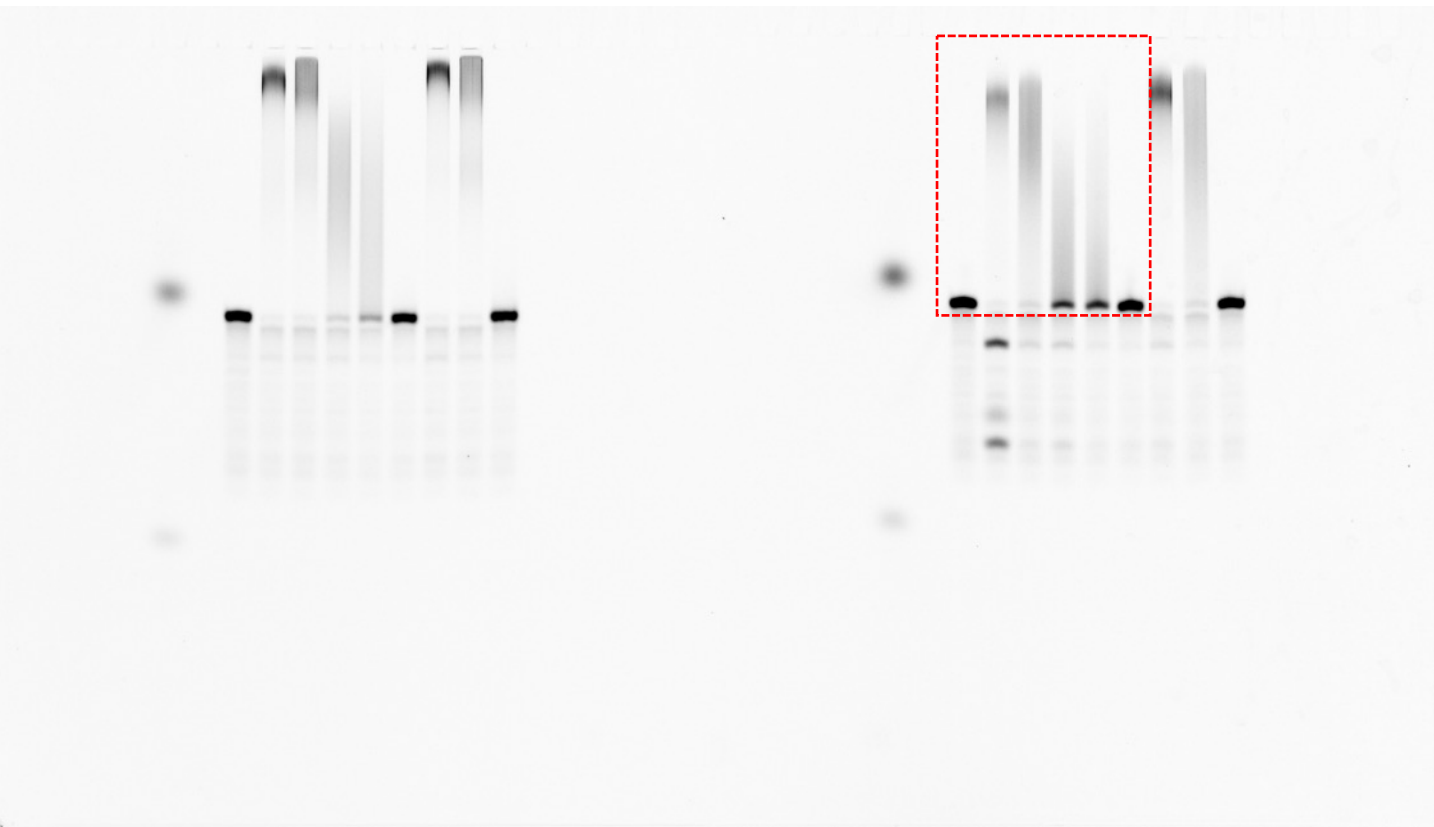

Supplement: fig4-data5 [file elife-80332-fig4-data5-v2.zip]

Figure 4-figure supplement 1-source data 1

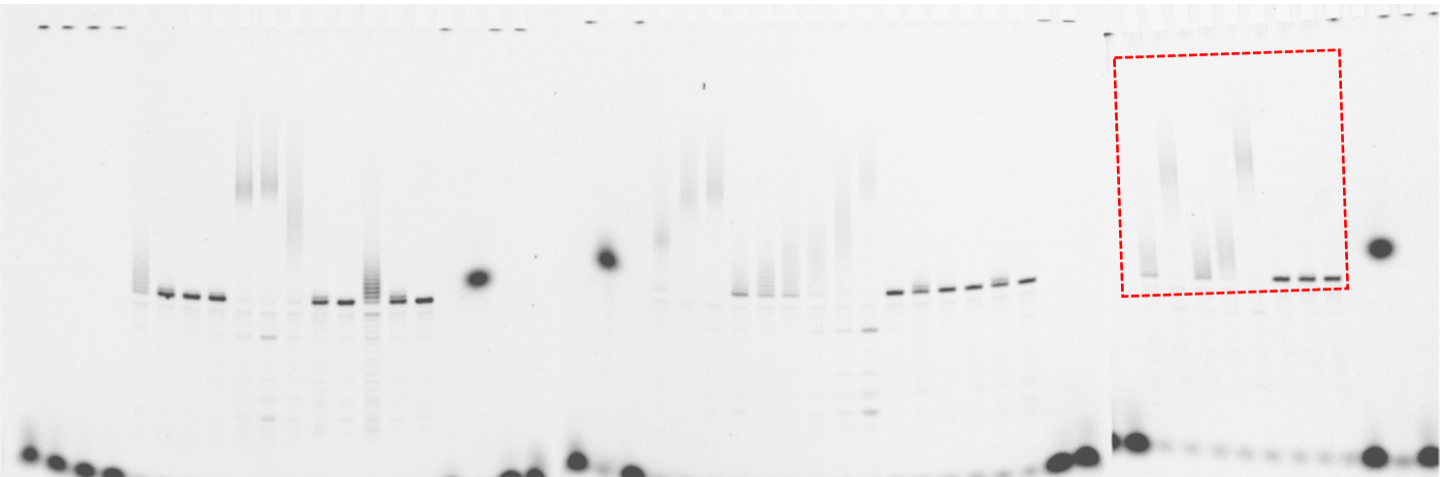

Supplement: fig4-figsupp1-data1 [file Figure 4-figure supplement 1-source data 1.pdf › Figure 4-figure supplement 1-source data 1.pdf]

Figure 4-figure supplement 1-source data 2

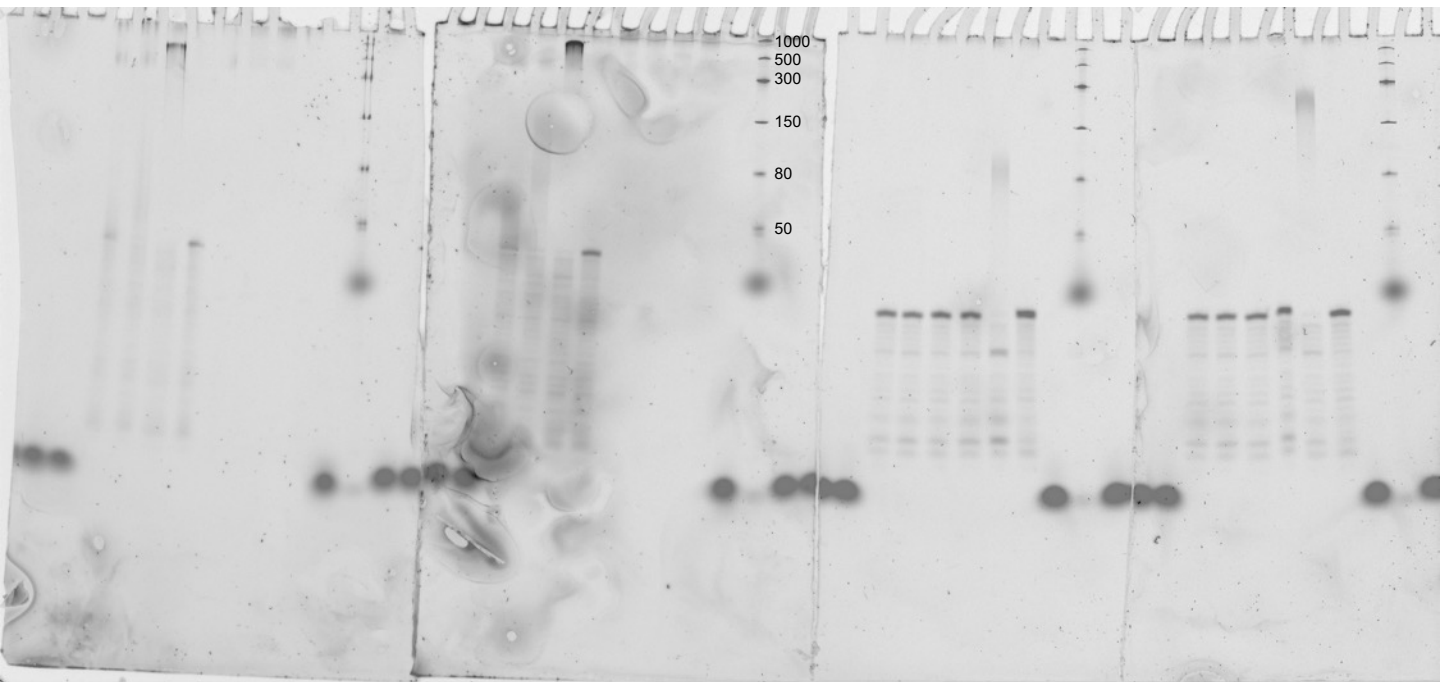

Overlay  
473 nm/635 nm

Supplement: fig4-figsupp1-data2 [file Figure 4-figure supplement 1-source data 2.pdf › Figure 4-figure supplement 1-source data 2.pdf]
